# Supplementary material for: Sex Differences in the Effect of Vitamin D on Fatigue in Palliative Cancer Care—A Post Hoc Analysis of the Randomized, Controlled Trial ‘Palliative-D’
Source: MDPI journal article supplement (doi:10.3390/cancers14030746), 2022-01-31
Supplement: s1 [file s1]

**Table S1.** Baseline demographics of all men and women completing the Palliative-D study regardless of treatment group. For statistical significance, Mann-Whitney test was used.

| Variable                       | All men (n = 74)<br>Median (IQR) | All women<br>(n = 76)<br>Median (IQR) | p-value    |
|--------------------------------|----------------------------------|---------------------------------------|------------|
| Age, years                     | 68 (64–74)                       | 68 (58–73)                            | 0.60       |
| 25-OHD, nmol/L                 | 37 (30–45)                       | 40 (31–46)                            | 0.26       |
| Fentanyl dose, ug/h            | 0 (0–25)                         | 0 (0–12)                              | 0.59       |
| No. days on antibiotics/month  | 0 (0–2)                          | 0 (0–0)                               | 0.09       |
| Albumin, g/L                   | 31 (27–36)                       | 32 (28–35)                            | 0.57       |
| Calcium, mmol/L                | 2.30 (2.22–2.36)                 | 2.32 (2.25–2.42)                      | 0.11       |
| Creatinine, $\mu$ mol/L        | 79 (68–95)                       | 64 (55–77)                            | ***<0.0001 |
| CRP, mg/L                      | 7 (2–29)                         | 7 (2–20)                              | 0.47       |
| ESAS fatigue                   | 3 (1–5)                          | 3 (1–5)                               | 0.91       |
| ESAS QoL                       | 3 (2–5)                          | 4 (2–5)                               | 0.56       |
| EORTC QLQ-C15-PAL, Q11 fatigue | 2 (2–3)                          | 2 (2–3)                               | 0.96       |
| EORTC QLQ-C15-PAL Q15 QoL      | 4 (3–5)                          | 4 (3–5)                               | 0.45       |

\*p < 0.05, \*\*p < 0.01, \*\*\*p < 0.001, S-25-OHD: S-25-hydroxyvitamin D, CRP: C-Reactive Protein, ESAS: Edmonton Symptom Assessment Scale (range 0-10), EORTC QLQ-C15-PAL: European Organization for Research and Treatment of Cancer Quality of Life Questionnaire C15 Palliative (fatigue Q 11 range 1-4, QoL Q 15 range 1-7), QoL: Quality of Life Q: Question. Creatinine reference interval  $\geq 18$  years: men <100 $\mu$ mol/L, women <90 $\mu$ mo/L.

**Table S2.** Baseline characteristics of women completing the Palliative-D study, split by treatment group of vitamin D or placebo.

| Variable                       | Vitamin D                      | Placebo                        | p-value |
|--------------------------------|--------------------------------|--------------------------------|---------|
|                                | Women (n = 33)<br>Median (IQR) | Women (n = 43)<br>Median (IQR) |         |
| Age, years                     | 69 (59–75)                     | 68 (59–73)                     | 0.71    |
| 25-OHD, nmol/L                 | 40 (27–48)                     | 40 (32–45)                     | 0.85    |
| Fentanyl dose, ug/h            | 0 (0–37)                       | 0 (0–12)                       | 0.26    |
| No. days on antibiotics/month  | 0 (0–3)                        | 0 (0–0)                        | *0.01   |
| Albumin, g/L                   | 32 (29–36)                     | 32 (28–34)                     | 0.25    |
| Calcium, mmol/L                | 2.31 (2.23–2.42)               | 2.33 (2.26–2.41)               | 0.45    |
| Creatinine, $\mu$ mol/L        | 61 (55–77)                     | 64 (55–77)                     | >0.99   |
| CRP, mg/L                      | 7 (2–23)                       | 5 (2–14)                       | 0.82    |
| ESAS fatigue                   | 3 (1–6)                        | 3 (2–5)                        | 0.83    |
| ESAS QoL                       | 4 (2–6)                        | 4 (2–5)                        | 0.84    |
| EORTC QLQ-C15-PAL, Q11 fatigue | 2 (2–3)                        | 2 (2–3)                        | 0.90    |
| EORTC QLQ-C15-PAL Q15 QoL      | 5 (4–5)                        | 4 (3–5)                        | 0.25    |

\*p < 0.05, \*\*p < 0.01, \*\*\*p < 0.001, S-25-OHD: S-25-hydroxyvitamin D, CRP: C-Reactive Protein, ESAS: Edmonton Symptom Assessment Scale (range 0-10), EORTC QLQ-C15-PAL: European Organization for Research and Treatment of Cancer Quality of Life Questionnaire C15 Palliative (fatigue Q 11 range 1-4, QoL Q 15 range 1-7), QoL: Quality of Life Q: Question.

**Table S3.** Baseline characteristics of men completing the Palliative-D study, split by treatment group of vitamin D or placebo.

| Variable                       | Vitamin D                    | Placebo                      | p-value |
|--------------------------------|------------------------------|------------------------------|---------|
|                                | Men (n = 34)<br>Median (IQR) | Men (n = 40)<br>Median (IQR) |         |
| Age, years                     | 68 (60–75)                   | 70 (64–73)                   | 0.73    |
| 25-OHD, nmol/L                 | 39 (30–46)                   | 36 (28–44)                   | 0.37    |
| Fentanyl dose, ug/h            | 0 (0–25)                     | 0 (0–22)                     | 0.98    |
| No. days on antibiotics/month  | 0 (0–0)                      | 0 (0–4)                      | 0.33    |
| Albumin, g/L                   | 32 (27–36)                   | 31 (28–36)                   | 0.95    |
| Calcium, mmol/L                | 2.31 (2.21–2.38)             | 2.30 (2.22–2.36)             | 0.94    |
| Creatinine, $\mu$ mol/L        | 80 (68–97)                   | 77 (67–96)                   | 0.80    |
| CRP, mg/L                      | 4 (1–31)                     | 8 (3–29)                     | 0.45    |
| ESAS fatigue                   | 4 (1–5)                      | 3 (1–5)                      | 0.76    |
| ESAS QoL                       | 3 (1–5)                      | 4 (2–5)                      | 0.47    |
| EORTC QLQ-C15-PAL, Q11 fatigue | 2 (2–3)                      | 3 (2–3)                      | 0.20    |
| EORTC QLQ-C15-PAL Q15 QoL      | 4 (3–6)                      | 4 (3–5)                      | 0.61    |

\*p < 0.05, \*\*p < 0.01, \*\*\*p < 0.001, S-25-OHD: S-25-hydroxyvitamin D, CRP: C-Reactive Protein, ESAS: Edmonton Symptom Assessment Scale (range 0-10), EORTC QLQ-C15-PAL: European Organization for Research and Treatment of Cancer Quality of Life Questionnaire C15 Palliative (fatigue Q 11 range 1-4, QoL Q 15 range 1-7), QoL: Quality of Life Q: Question.
